# Supplementary material
Source: PubMed Central journal article supplement (PMC1138965)
Supplement: bj3880573add.pdf [file bj3880573add.pdf]

### **Supplementary Figure 1**

#### **Annexin V staining assay comparing transfection reagent cytotoxicity**

(A) Left panel: FACS analysis performed at 3 days post-transfection using LF. The percentage of annexin V staining cells is shown. U87-MG cells were treated with 20  $\mu$ M LY294002 for 3 days where indicated (replaced every 12 h in fresh medium). As a positive control, cells were treated with 10 ng/ml tumour necrosis factor  $\alpha$  (TNF $\alpha$ ) in the presence of 10  $\mu$ g/ml cycloheximide (CHX) for 18 h. Right panel: immunoblot analysis representing PDK1 expression level after treatment with ASO, MM, PDK1-siRNA#1 at 3 days post-transfection. (B) This is the same as described for (A), but using OLF to transfect oligonucleotides into U87-MG cells.

### **Supplementary Figure 2**

#### **Titration of PDK1-siRNA#1 concentration at 2 days post-transfection**

PDK1 immunoblot analysis following transfection of various concentrations of PDK1-siRNA#1 (from 1 nM to 300 nM) using LF.

### **Supplementary Figure 3**

#### **Effect of PTEN-siRNA on genes commonly altered by ASO, MM and PDK1-siRNA#1 at 3 days post-transfection**

Venn diagrams representing the number of genes regulated by each treatment, as indicated next to each circle, after subtraction of the PTEN-siRNA regulated genes. The pair-wise comparison was performed using SAM analysis with a FDR<0.03%. Left panel: up-regulated genes; right panel: down-regulated genes.

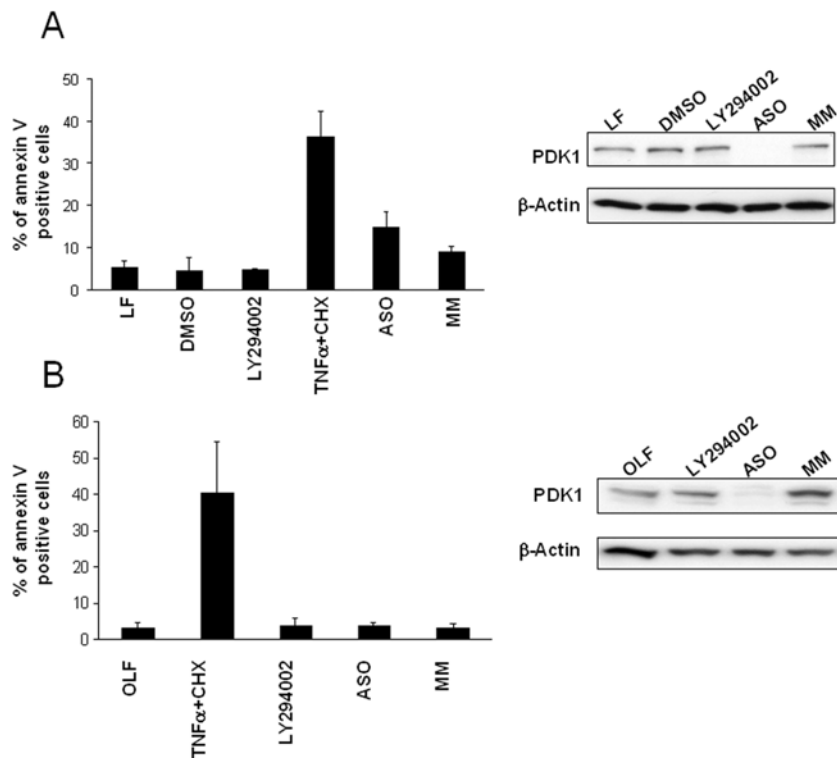

Figure 1

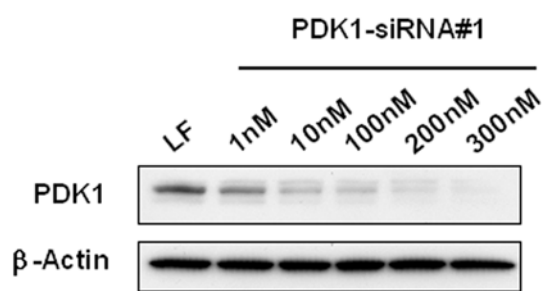

Figure 2

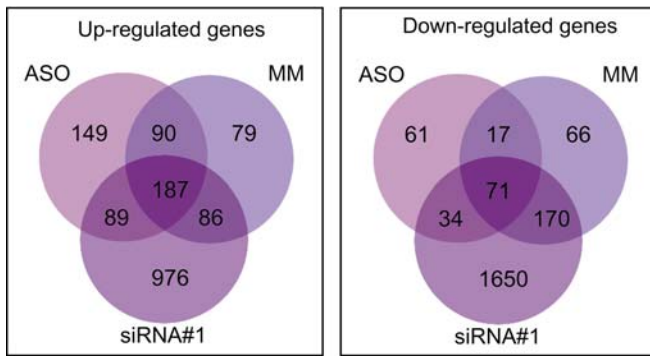

Figure 3
